# Supplementary material for: Longitudinal Microbiome Composition and Stability Correlate with Increased Weight and Length of Very-Low-Birth-Weight Infants
Source: PubMed Central journal article supplement (PMC6392092; doi:10.1128/msystems.00229-18), 2019-02-26

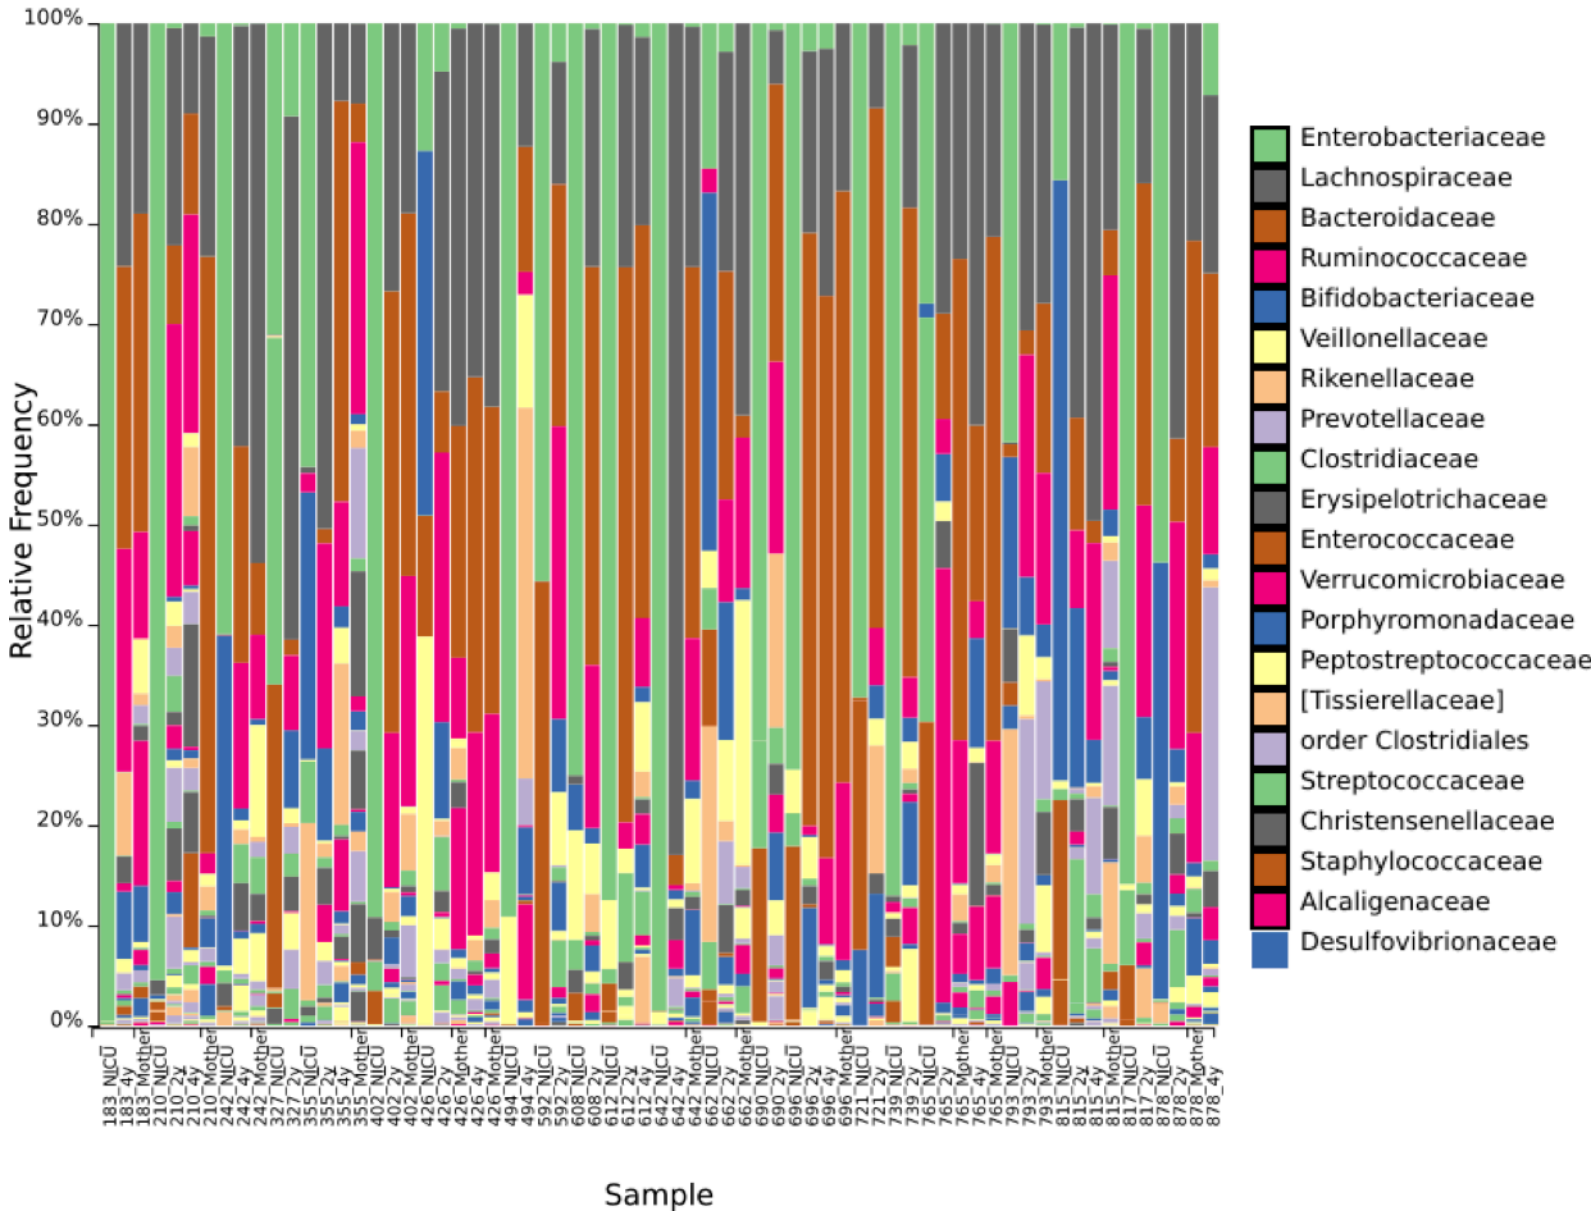

Supplement: mSystems.00229-18-sf002.pdf [file mSystems.00229-18-sf002.pdf]
